# Supplementary material for: Optimal Localist and Distributed Coding of Spatiotemporal Spike Patterns Through STDP and Coincidence Detection
Source: PubMed Central journal article supplement (PMC6153331; doi:10.3389/fncom.2018.00074), 2018-09-18
Supplement: Data_Sheet_1.pdf [file Data_Sheet_1.pdf]

# Optimal localist and distributed coding of spatiotemporal spike patterns through STDP and coincidence detection

Timothée Masquelier & Saeed Reza Kheradpisheh

## Appendix

### Graded weights

In this paper, we assumed unitary (or binary) synaptic weights: all connected afferents had the same synaptic weight<sup>1</sup>. This constraint strongly simplified the analytical calculations. But could the *SNR* be even higher if we removed this constraint, and by how much? Intuitively, when one wants to detect a spike pattern that has just occurred, one should put strong weights on the synapses corresponding to the most recent pattern spikes, since these weights will increase  $V_{\max}$  more than  $V_{\text{noise}}$ . Conversely, very old pattern spikes that fall outside the integration window (if any) should be associated to nil weights: any positive value would only increase  $V_{\text{noise}}$ , not  $V_{\max}$ . But between those two extremes, it might be a good idea to use intermediate weight values.

To check this intuition, we used numerical optimizations using a simplified setup. We used a single pattern ( $P = 1$ ), that was repeated in the absence of jitter ( $T = 0$ ). We divided the pattern into  $n$  different periods  $\Delta t_1, \dots, \Delta t_n$  (in reverse chronological order), each one corresponding to a different synaptic weight  $w_1, \dots, w_n$  (see Figure 1 left for an example with  $n = 2$ ). More specifically: the  $M_1$  afferents that fire in the  $\Delta t_1$  window are connected with weight  $w_1$ . The  $M_2$  afferents that fire in the  $\Delta t_2$  window, but not in the  $\Delta t_1$  one, are connected with weight  $w_2$ . More generally, the  $M_i$  afferents that fire in the  $\Delta t_i$  window, but not in the  $\Delta t_1 \dots \Delta t_{i-1}$  ones, are connected with weight  $w_i$ .

With this simple set up, the *SNR* can be computed analytically. For example, if  $n = 2$  (Fig. 1 left), we have:

$$\langle M_1 \rangle = N(1 - e^{-f\Delta t_1}), \quad (1)$$

$$\langle M_2 \rangle = N(1 - e^{-f\Delta t_2})e^{-f\Delta t_1}. \quad (2)$$

The asymptotic steady regimes for the two time windows are:

$$\langle V_1^\infty \rangle = \tau f w_1 N, \quad (3)$$

$$\langle V_2^\infty \rangle = \tau f (w_2 N + (w_1 - w_2) \langle M_1 \rangle). \quad (4)$$

Let's call  $V_i$  the potential at the end of window  $\Delta t_i$ , and  $V_{n+1} = V_{\text{noise}}$ . Then  $V_{\max} = V_1$  can be computed iteratively:

$$V_2 = (1 - e^{-\Delta t_2/\tau})(V_2^\infty - V_3), \quad (5)$$

$$V_1 = (1 - e^{-\Delta t_1/\tau})(V_1^\infty - V_2). \quad (6)$$

Furthermore [Burkitt, 2006],

$$V_{\text{noise}} = \tau f (w_1 M_1 + w_2 M_2), \quad (7)$$

and:

$$\sigma_{\text{noise}} = \sqrt{\tau f (w_1^2 M_1 + w_2^2 M_2) / 2}. \quad (8)$$

So we have everything we need to compute the *SNR*.

Equations 1 – 8 can be generalized to  $n > 2$ :

$$\langle M_i \rangle = N(1 - e^{-f\Delta t_i})e^{-f \sum_{j=1}^{i-1} \Delta t_j}, \quad (9)$$

$$\langle V_i^\infty \rangle = \tau f \left( w_i N + \sum_{j=1}^{i-1} (w_j - w_i) \langle M_j \rangle \right) \quad (10)$$

and  $V_{\max} = V_1$  can be computed iteratively from  $V_{n+1} = V_{\text{noise}}$  using:

$$V_{i-1} = (1 - e^{-\Delta t_{i-1}/\tau})(V_{i-1}^\infty - V_i). \quad (11)$$

Furthermore [Burkitt, 2006],

$$V_{\text{noise}} = \tau f \sum w_i M_i, \quad (12)$$

<sup>1</sup> Numerical simulations with STDP used graded weights during learning, but not after convergence.

and:

$$\sigma_{\text{noise}} = \sqrt{\tau f \sum w_i^2 M_i / 2}. \quad (13)$$

So the  $SNR$  can be computed for any  $n$ , and, importantly, it is differentiable with respect to the  $w_i$ . We can thus use efficient numerical methods to optimize these weights. Since scaling the weights does not change the  $SNR$ , we imposed  $w_1 = 1$ . Figure 1 right gives an example with  $n = 70$ . Here the  $\Delta t_i$  were all equal to  $5\tau/n$ , and we optimized the corresponding  $w_i$ . We chose  $\tau = 10\text{ms}$ , and  $f = 1, 5,$  and  $10\text{Hz}$ . The gain w.r.t. binary weights for the  $SNR$  were modest: 10.5%, 9.6% and 8.9% respectively. As  $f$  tends towards 0, the optimal weights appears to converge towards  $e^{t/\tau}$  (even if we could not prove it): the  $f = 1\text{Hz}$  curve (solid blue) is almost identical to  $e^{t/\tau}$  (dashed red).

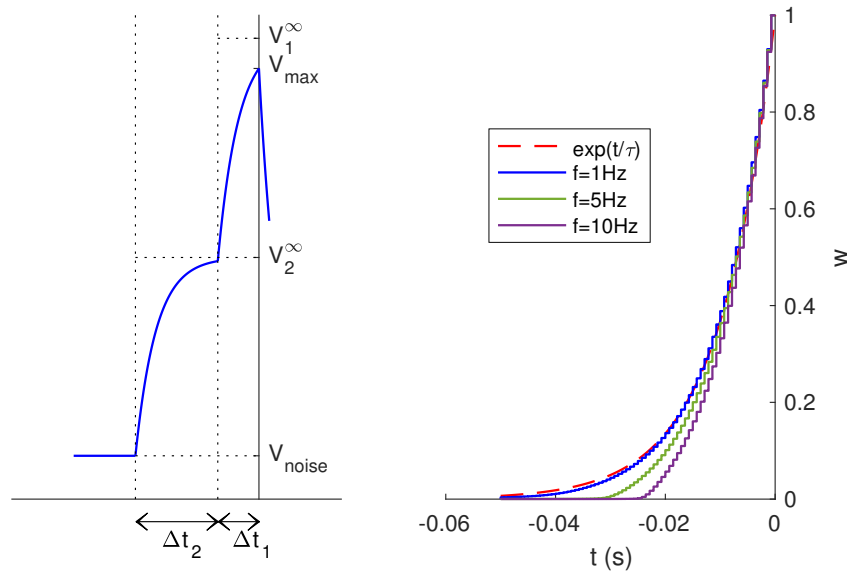

Fig. 1: Optimization with graded weights. (Left) Didactic example with  $n = 2$  weight values:  $w_1$  for all the afferents that fire in the  $\Delta t_1$  window, and  $w_2 < w_1$  for all the afferents that fire in the  $\Delta t_2$  window but not in the  $\Delta t_1$  one.  $V_1^\infty$  and  $V_2^\infty$  are the asymptotic potentials for the two periods.  $V_{\text{max}}$  can be computed from those two values (see text). (Right) Numerical optimization of the weights with  $n = 70$ . With small  $f$ , the optimal solution appears to be close to  $e^{t/\tau}$ .

## References

- Burkitt, A. N. (2006). A review of the integrate-and-fire neuron model: I. Homogeneous synaptic input. *Biological Cybernetics*, 95(1):1–19.
